# Supplementary material
Source: PubMed Central journal article supplement (PMC4913526)
Supplement: supp_gmw037_322SuppleTableS7.pdf [file supp_gmw037_322SuppleTableS7.pdf]

| #  | Strains<br>sRNA | 26 | 27          | 28   | 29   | 30   | 31   | 32   | 33   | 34 | 35   | 36 | 37   | 38   | 39   | 40   | 41   | 42   | 43   | 44   | 45   | 46   | 47   | 48   | 49  |   |
|----|-----------------|----|-------------|------|------|------|------|------|------|----|------|----|------|------|------|------|------|------|------|------|------|------|------|------|-----|---|
|    |                 | 1  | Y_ncRv2656A | 1    | 1    | 1    | 0.98 | 1    | 1    | 1  | 0.98 | 1  | 0    | 0    | 0    | 0    | 0    | 0    | 0    | 0    | 0    | 0    | 0    | 0    | 0   | 0 |
| 2  | Y_ncRv2111A     | 1  | 1           | 1    | 1    | 1    | 1    | 1    | 0.95 | 1  | 0    | 0  | 0.95 | 0    | 0    | 0.93 | 0    | 0.81 | 0    | 0    | 0    | 0    | 0    | 0    | 0   | 0 |
| 3  | Y_ncRv1162Bc    | 1  | 1           | 1    | 1    | 1    | 1    | 1    | 0.99 | 1  | 0    | 0  | 0    | 0    | 0    | 0    | 0    | 0    | 0    | 0    | 0    | 0    | 0.86 | 0    | 0   |   |
| 4  | Y_ncRv3303A     | 1  | 1           | 1    | 1    | 1    | 1    | 1    | 1    | 1  | 0    | 0  | 0    | 0    | 0    | 0    | 0    | 0    | 0.86 | 0    | 0    | 0.86 | 0    | 0    | 0   | 0 |
| 5  | Y_ncRv11144Ac   | 1  | 1           | 0.82 | 1    | 1    | 1    | 1    | 1    | 1  | 0    | 0  | 0    | 0    | 0    | 0    | 0    | 0    | 0    | 0    | 0    | 0    | 0.74 | 0    | 0   |   |
| 6  | Y_ncRv11133Ac   | 1  | 1           | 1    | 1    | 1    | 1    | 1    | 0    | 1  | 0    | 0  | 0    | 0    | 0    | 0    | 0    | 0    | 0    | 0    | 0    | 0    | 0    | 0    | 0   |   |
| 7  | Y_ncRv1472Ac    | 1  | 1           | 1    | 1    | 1    | 1    | 1    | 1    | 1  | 0    | 0  | 0    | 0    | 0    | 0    | 0    | 0    | 0    | 0    | 0    | 0    | 0    | 0    | 0   |   |
| 8  | Y_ncRv0101Ac    | 1  | 1           | 1    | 1    | 1    | 1    | 1    | 1    | 1  | 0    | 0  | 0    | 0    | 0    | 0    | 0    | 0    | 0    | 0    | 0    | 0    | 0    | 0    | 0   |   |
| 9  | Y_ncRv10699A    | 1  | 1           | 1    | 0.99 | 1    | 1    | 1    | 1    | 1  | 0    | 0  | 0.81 | 0    | 0    | 0    | 0    | 0    | 0    | 0    | 0    | 0    | 0    | 0    | 0   |   |
| 10 | Y_ncRv13241B    | 1  | 1           | 1    | 0.98 | 0.98 | 0.98 | 0.98 | 0    | 1  | 0    | 0  | 0    | 0    | 0    | 0    | 0    | 0    | 0    | 0    | 0    | 0    | 0    | 0    | 0   |   |
| 11 | Y_ncRv1734C     | 1  | 1           | 1    | 1    | 1    | 1    | 1    | 1    | 1  | 0    | 0  | 0    | 0    | 0    | 0    | 0    | 0    | 0    | 0    | 0    | 0    | 0    | 0    | 0   |   |
| 12 | Y_ncRv11033A    | 1  | 1           | 1    | 1    | 1    | 1    | 1    | 1    | 1  | 0    | 0  | 0    | 0    | 0    | 0    | 0    | 0    | 0    | 0    | 0    | 0    | 0.96 | 0    | 0   |   |
| 13 | Y_ncRv11821Ac   | 1  | 1           | 1    | 1    | 1    | 1    | 1    | 1    | 1  | 0    | 0  | 0    | 0    | 0    | 0    | 0    | 0    | 0    | 0    | 0    | 0    | 0    | 0    | 0   |   |
| 14 | Y_ncRv10650Bc   | 1  | 1           | 1    | 1    | 1    | 1    | 1    | 1    | 1  | 0    | 0  | 0    | 0    | 0    | 0    | 0    | 0    | 0    | 0    | 0    | 0    | 0    | 0    | 0   |   |
| 15 | Y_ncRv10070Ac   | 1  | 1           | 1    | 0    | 1    | 1    | 1    | 1    | 1  | 0    | 0  | 0    | 0    | 0    | 0    | 0    | 0    | 0    | 0    | 0    | 0    | 0    | 0    | 0   |   |
| 16 | Y_ncRv10572Ac   | 1  | 1           | 1    | 1    | 1    | 1    | 1    | 1    | 1  | 0    | 0  | 0    | 0    | 0    | 0    | 0    | 0    | 0    | 0    | 0    | 0    | 0    | 0    | 0   |   |
| 17 | Y_ncRv11179Ac   | 1  | 1           | 1    | 1    | 1    | 1    | 1    | 0.93 | 1  | 0    | 0  | 0    | 0    | 0    | 0    | 0    | 0    | 0    | 0    | 0    | 0    | 0    | 0    | 0   |   |
| 18 | Y_ncRv12442Ac   | 1  | 1           | 1    | 1    | 1    | 1    | 1    | 0.95 | 1  | 0    | 0  | 0    | 0    | 0    | 0    | 0    | 0    | 0    | 0    | 0    | 0    | 0    | 0    | 0   |   |
| 19 | Y_ncRv0189A     | 1  | 1           | 1    | 1    | 1    | 0.98 | 0.98 | 1    | 1  | 0    | 0  | 0    | 0    | 0    | 0    | 0    | 0    | 0    | 0    | 0    | 0    | 0    | 0    | 0   |   |
| 20 | Y_ncRv13487Bc   | 1  | 1           | 1    | 1    | 1    | 1    | 1    | 0.99 | 1  | 0    | 0  | 0    | 0    | 0    | 0    | 0    | 0    | 0    | 0    | 0    | 0    | 0    | 0    | 0   |   |
| 21 | Y_ncRv0761A     | 1  | 1           | 1    | 1    | 1    | 1    | 1    | 1    | 1  | 0    | 0  | 0    | 0    | 0    | 0    | 0    | 0    | 0    | 0    | 0    | 0    | 0    | 0    | 0   |   |
| 22 | Y_ncRv1322AA    | 1  | 1           | 1    | 1    | 1    | 1    | 1    | 1    | 1  | 0    | 0  | 0    | 0    | 0    | 0    | 0    | 0    | 0    | 0    | 0    | 0    | 0    | 0    | 0   |   |
| 23 | Y_ncRv12920A    | 1  | 1           | 1    | 0.96 | 1    | 1    | 1    | 1    | 1  | 0    | 0  | 0.69 | 0.81 | 0.8  | 0    | 0    | 0    | 0.85 | 0.87 | 0.89 | 0.85 | 0.93 | 0    | 0   |   |
| 24 | Y_ncRv0501Ac    | 1  | 1           | 1    | 1    | 1    | 1    | 1    | 1    | 1  | 0    | 0  | 0.79 | 0.79 | 0.79 | 0    | 0    | 0    | 0.8  | 0.8  | 0.8  | 0.8  | 0    | 0.8  | 0.8 |   |
| 25 | Y_ncRv0356A     | 1  | 1           | 1    | 1    | 1    | 1    | 1    | 1    | 1  | 0    | 0  | 0.66 | 0.78 | 0.78 | 0    | 0    | 0    | 0    | 0    | 0    | 0    | 0    | 0.58 | 0   |   |
| 26 | Y_ncRv1253Ac    | 1  | 1           | 1    | 1    | 1    | 1    | 1    | 1    | 1  | 0    | 0  | 0.87 | 0.87 | 0.87 | 0    | 0    | 0    | 0    | 0    | 0    | 0    | 0    | 0    | 0   |   |
| 27 | Y_ncRv0267Ac    | 1  | 1           | 1    | 1    | 1    | 1    | 1    | 1    | 1  | 0    | 0  | 0.89 | 0.89 | 0.89 | 0.65 | 0    | 0.89 | 0.79 | 0    | 0    | 0.79 | 0    | 0    | 0   |   |
| 28 | Y_ncRv1633Bc    | 1  | 1           | 1    | 1    | 1    | 1    | 1    | 1    | 1  | 0    | 0  | 0    | 0    | 0    | 0    | 0.73 | 0.73 | 0.82 | 0    | 0    | 0.82 | 0.95 | 0    | 0   |   |

| #  | Strains<br>sRNA | 50   | 51          | 52 | 53   | 54   | 55   | 56   | 57   | 58   | 59   | 60   | 61   | 62   | 63   | 64   | 65   |
|----|-----------------|------|-------------|----|------|------|------|------|------|------|------|------|------|------|------|------|------|
|    |                 | 1    | Y_ncRv2656A | 0  | 0    | 0    | 0    | 0    | 0    | 0    | 0    | 0    | 0    | 0    | 0    | 0    | 0    |
| 2  | Y_ncRv2111A     | 0    | 0           | 0  | 0.75 | 0.81 | 0.91 | 0.82 | 0    | 0    | 0.93 | 0.93 | 0.93 | 0    | 0.89 | 0.81 | 0.74 |
| 3  | Y_ncRv1162Bc    | 0    | 0           | 0  | 0    | 0    | 0    | 0.73 | 0.73 | 0.8  | 0.75 | 0    | 0    | 0    | 0    | 0.65 | 0    |
| 4  | Y_ncRv3303A     | 0    | 0           | 0  | 0    | 0    | 0    | 0    | 0    | 0    | 0    | 0    | 0    | 0.86 | 0    | 0    | 0.86 |
| 5  | Y_ncRv11144Ac   | 0.72 | 0.67        | 0  | 0    | 0    | 0    | 0    | 0    | 0    | 0    | 0    | 0    | 0    | 0.73 | 0    | 0    |
| 6  | Y_ncRv11133Ac   | 0    | 0           | 0  | 0    | 0    | 0    | 0    | 0    | 0    | 0    | 0    | 0    | 0    | 0    | 0    | 0    |
| 7  | Y_ncRv1472Ac    | 0.74 | 0.74        | 0  | 0    | 0    | 0    | 0    | 0    | 0    | 0    | 0    | 0    | 0    | 0.74 | 0    | 0    |
| 8  | Y_ncRv0101Ac    | 0    | 0           | 0  | 0    | 0    | 0    | 0    | 0    | 0    | 0    | 0    | 0    | 0    | 0    | 0    | 0    |
| 9  | Y_ncRv10699A    | 0    | 0           | 0  | 0    | 0    | 0    | 0    | 0    | 0    | 0    | 0    | 0    | 0    | 0    | 0    | 0    |
| 10 | Y_ncRv13241B    | 0    | 0           | 0  | 0    | 0    | 0    | 0    | 0    | 0    | 0    | 0    | 0    | 0    | 0    | 0    | 0    |
| 11 | Y_ncRv1734C     | 0    | 0           | 0  | 0    | 0    | 0    | 0    | 0    | 0    | 0    | 0    | 0    | 0    | 0    | 0    | 0    |
| 12 | Y_ncRv11033A    | 0    | 0           | 0  | 0    | 0    | 0    | 0    | 0    | 0    | 0    | 0    | 0    | 0    | 0    | 0    | 0    |
| 13 | Y_ncRv11821Ac   | 0    | 0           | 0  | 0    | 0    | 0    | 0    | 0    | 0    | 0    | 0    | 0    | 0    | 0    | 0    | 0.8  |
| 14 | Y_ncRv10650Bc   | 0    | 0           | 0  | 0    | 0    | 0    | 0    | 0    | 0.76 | 0    | 0    | 0    | 0    | 0    | 0    | 0    |
| 15 | Y_ncRv10070Ac   | 0    | 0           | 0  | 0    | 0    | 0    | 0    | 0    | 0    | 0    | 0    | 0    | 0    | 0    | 0    | 0    |
| 16 | Y_ncRv10572Ac   | 0    | 0           | 0  | 0    | 0    | 0    | 0    | 0    | 0    | 0    | 0    | 0    | 0    | 0    | 0    | 0    |
| 17 | Y_ncRv11179Ac   | 0    | 0           | 0  | 0    | 0    | 0    | 0    | 0    | 0    | 0    | 0    | 0    | 0    | 0    | 0    | 0    |
| 18 | Y_ncRv12442Ac   | 0    | 0           | 0  | 0    | 0    | 0    | 0    | 0    | 0    | 0    | 0    | 0    | 0    | 0    | 0    | 0    |
| 19 | Y_ncRv0189A     | 0    | 0           | 0  | 0    | 0    | 0    | 0    | 0    | 0    | 0    | 0    | 0    | 0    | 0    | 0    | 0    |
| 20 | Y_ncRv13487Bc   | 0    | 0           | 0  | 0    | 0    | 0    | 0    | 0    | 0    | 0    | 0    | 0    | 0    | 0    | 0    | 0    |
| 21 | Y_ncRv0761A     | 0    | 0           | 0  | 0    | 0    | 0    | 0    | 0    | 0    | 0    | 0    | 0    | 0    | 0    | 0    | 0    |
| 22 | Y_ncRv1322AA    | 0    | 0           | 0  | 0    | 0    | 0    | 0    | 0    | 0    | 0    | 0    | 0    | 0    | 0    | 0    | 0    |
| 23 | Y_ncRv12920A    | 0.83 | 0.83        | 0  | 0    | 0    | 0    | 0    | 0    | 0.78 | 0    | 0    | 0    | 0.87 | 0    | 0    | 0.87 |
| 24 | Y_ncRv0501Ac    | 0    | 0           | 0  | 0    | 0.66 | 0    | 0    | 0    | 0.7  | 0    | 0    | 0    | 0.8  | 0    | 0    | 0.8  |
| 25 | Y_ncRv0356A     | 0    | 0           | 0  | 0    | 0    | 0    | 0    | 0    | 0    | 0    | 0    | 0    | 0    | 0    | 0    | 0    |
| 26 | Y_ncRv1253Ac    | 0    | 0           | 0  | 0    | 0    | 0    | 0.76 | 0.76 | 0    | 0    | 0    | 0    | 0    | 0    | 0    | 0    |
| 27 | Y_ncRv0267Ac    | 0.74 | 0           | 0  | 0    | 0    | 0    | 0    | 0    | 0    | 0    | 0    | 0    | 0.79 | 0.73 | 0.86 | 0    |
| 28 | Y_ncRv1633Bc    | 0    | 0           | 0  | 0    | 0    | 0    | 0    | 0    | 0.67 | 0    | 0    | 0    | 0    | 0    | 0    | 0    |
